# Supplementary material for: The early life microbiota mediates maternal effects on offspring growth in a nonhuman primate
Source: PubMed Central journal article supplement — iScience. 2022 Feb 18;25(3):103948. doi: 10.1016/j.isci.2022.103948 (PMC8898918; doi:10.1016/j.isci.2022.103948), 2022-02-18
Supplement: mmc1.pdf [file mmc1.pdf]

**iScience, Volume 25**

**Supplemental information**

**The early life microbiota mediates  
maternal effects on offspring growth  
in a nonhuman primate**

**Lauren Petrullo, Alice Baniel, Matthew J. Jorgensen, Sierra Sams, Noah Snyder-Mackler, and Amy Lu**

Figure S1.

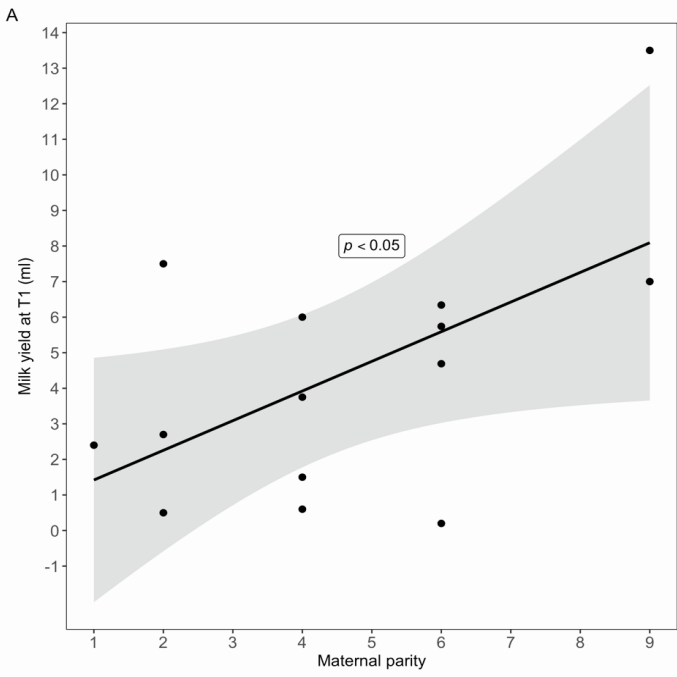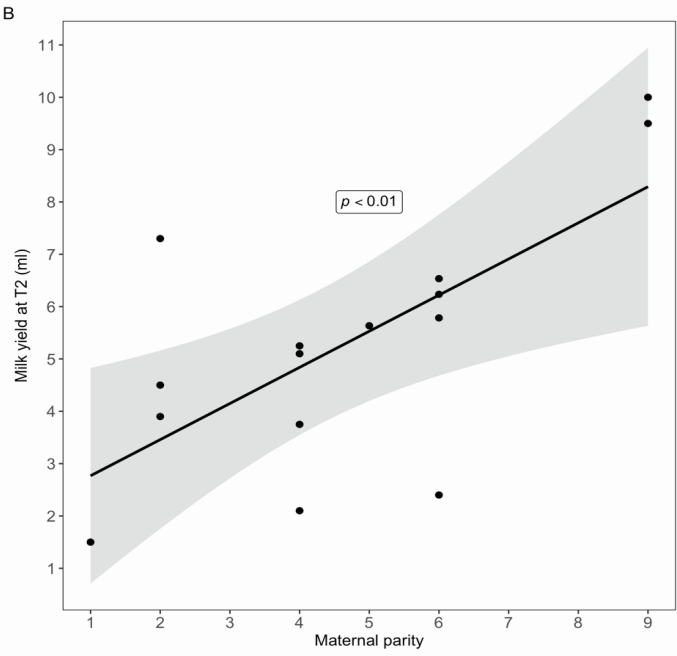

Figure S2.

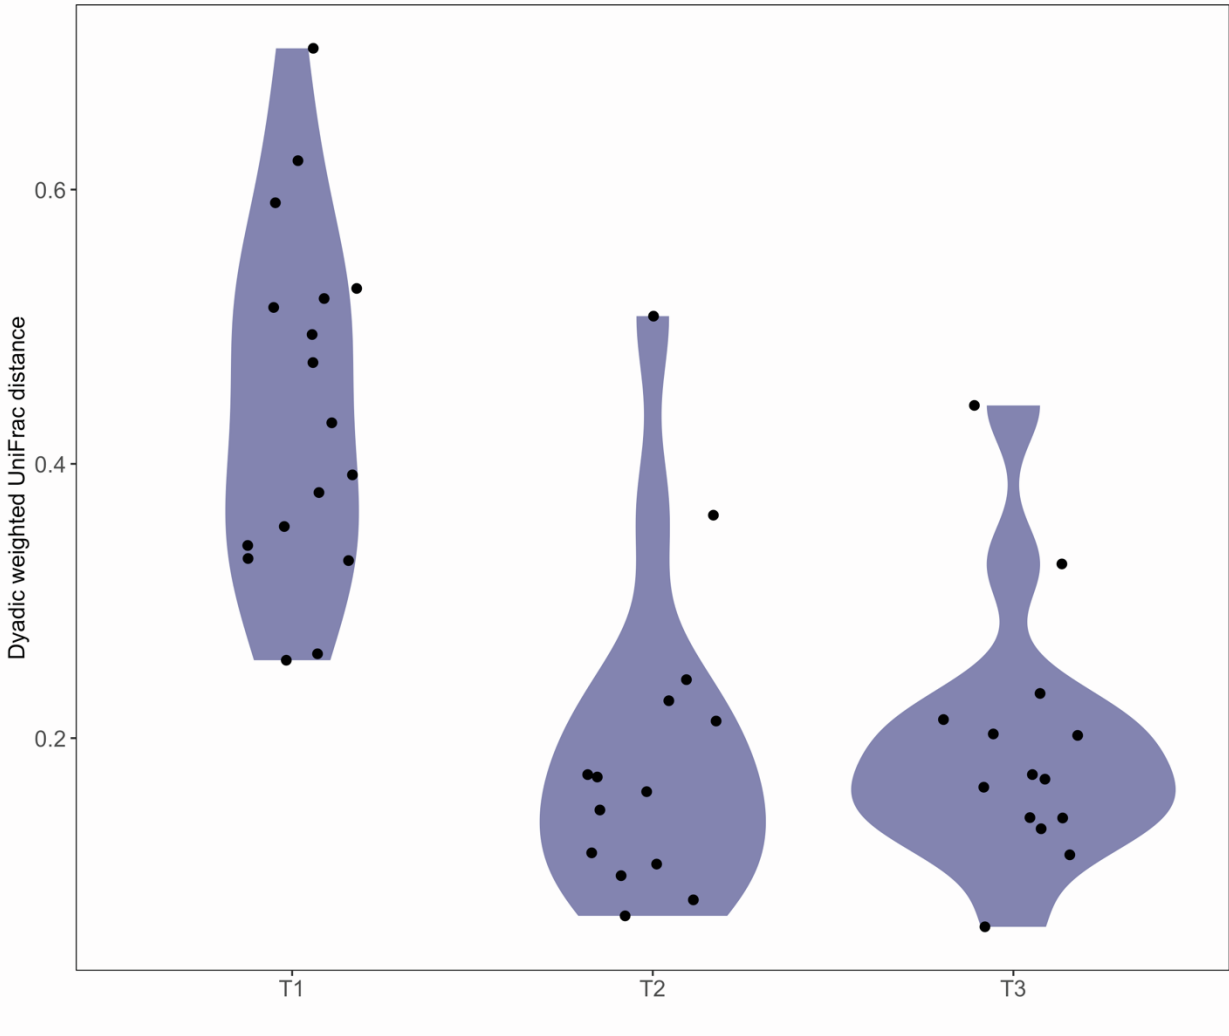

**Figure S3.**

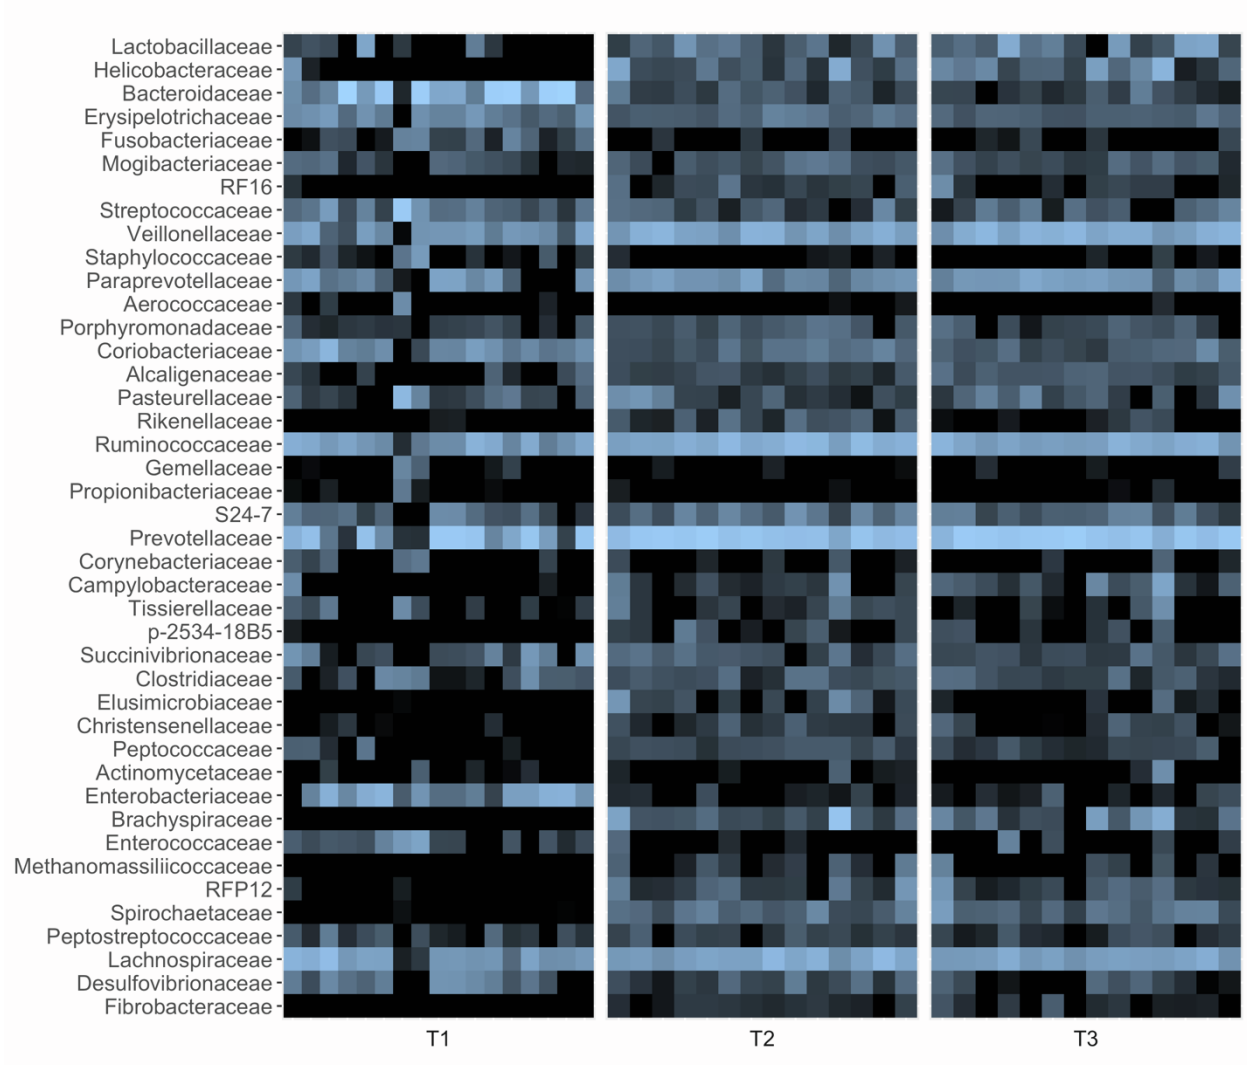

## SUPPLEMENTAL FIGURES LEGEND

**Figure S1.** Low parity females produce significantly lower milk volumes than high parity females. Partial residual plot controlling for diet. Related to Figure 1.

**Figure S2.** Compositional dissimilarity between the infant gut microbiome and the gut microbiome of their own mothers decreases sharply by 4 months of age (T2). Violin plot of dyadic weighted Unifrac distances across sampling time point, controlling for diet. Related to Figure 2.

**Figure S3.** Ecologically-oriented heatmap of the 42 most abundant bacterial families in the infant gut microbiome. Light blue colors reflect higher relative abundances; dark blue to black colors represent lower relative abundances. Related to Figure 2.
